# Supplementary material for: Amine-catalyzed substitution in CpFe(CO)2I by phosphine and bisphosphine ligands
Source: Royal Society of Chemistry journal article supplement (doi:10.1039/d4dt00416g), 2024-01-01
Supplement: d4dt00416g1.pdf [file d4dt00416g1.pdf]

## **Amine-catalyzed substitution of iodide in CpFe(CO)<sub>2</sub>I by phosphine and bisphosphine ligands**

Aneta Kosińska<sup>a</sup>, Daria Jamroz<sup>a</sup>, Agnieszka J. Rybarczyk-Pirek<sup>b</sup>, Sławomir Wojtulewski<sup>c</sup>, Marcin Palusiak<sup>b</sup>, Janusz Zakrzewski<sup>a</sup> and Bogna Rudolf<sup>a\*</sup>

<sup>a</sup>*Faculty of Chemistry, Department of Organic Chemistry, University of Lodz, Tamka 12, 91-403 Lodz, Poland*

<sup>b</sup>*University of Lodz, Faculty of Chemistry, Department of Physical Chemistry, Pomorska 163/165, 90-236 Lodz, Poland*

<sup>c</sup>*Department of Structural Chemistry, Faculty of Chemistry, University of Bialystok, 15-245 Bialystok, Poland*

|                                     |    |
|-------------------------------------|----|
| 1.1. Spectra and spectral data..... | 2  |
| 1.2. Crystallographic data.....     | 16 |

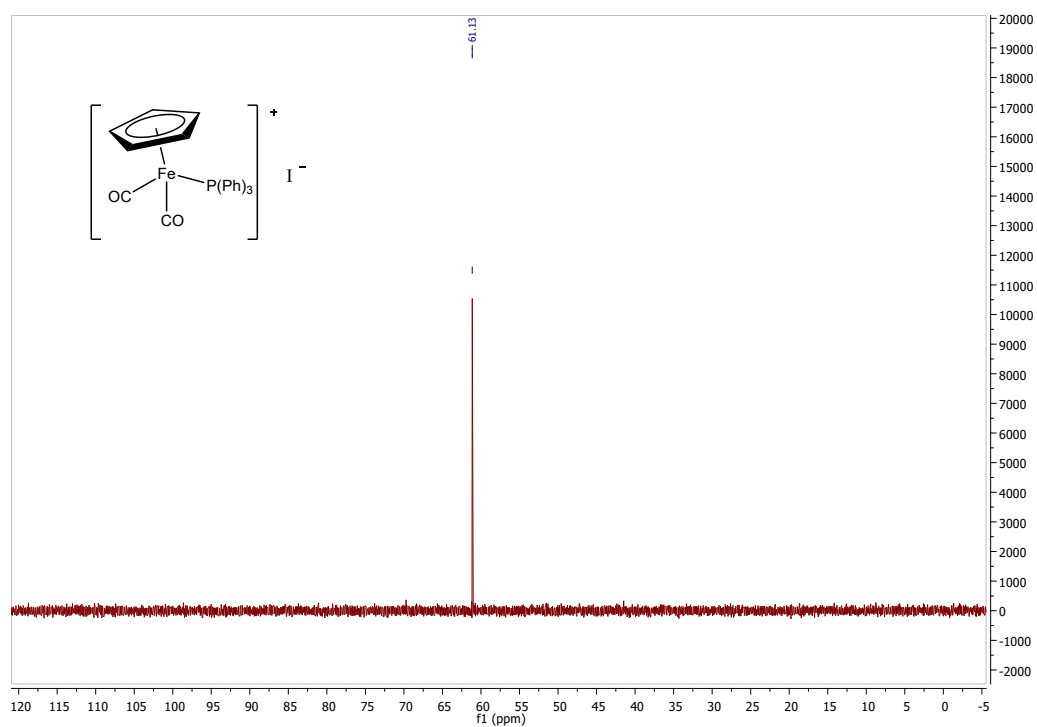

Figure S1. 243 MHz  $^{31}\text{P}$  NMR spectrum of **2** in  $\text{CDCl}_3$

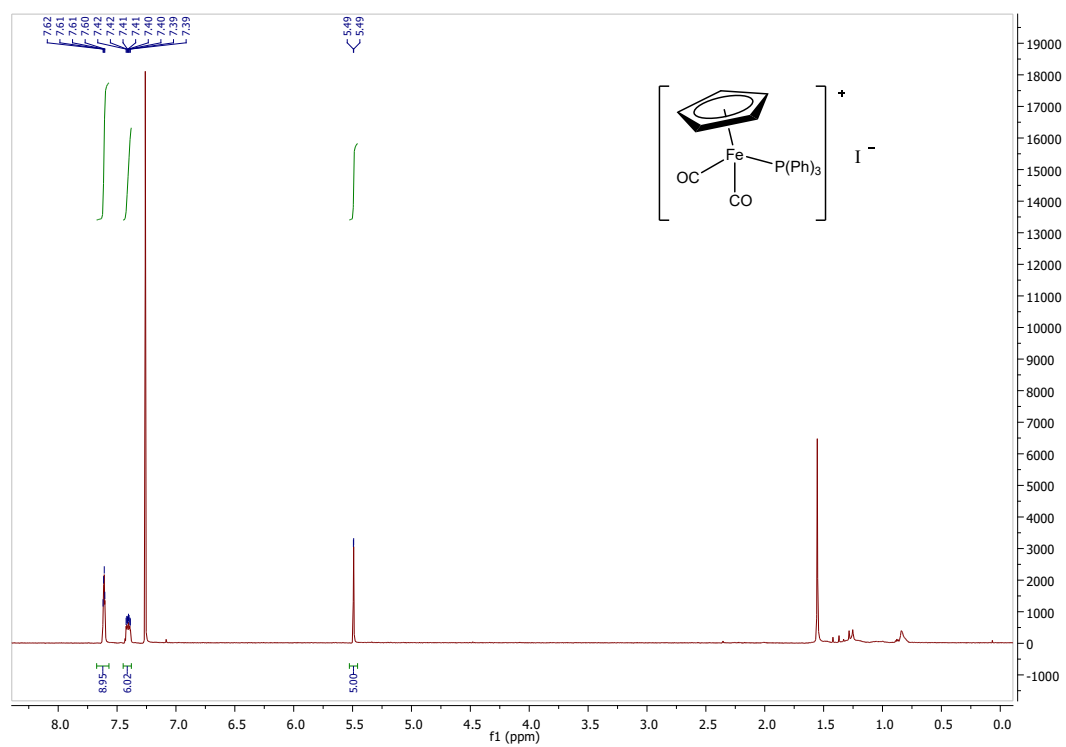

Figure S2. 600 MHz  $^1\text{H}$  NMR spectrum of **2** in  $\text{CDCl}_3$

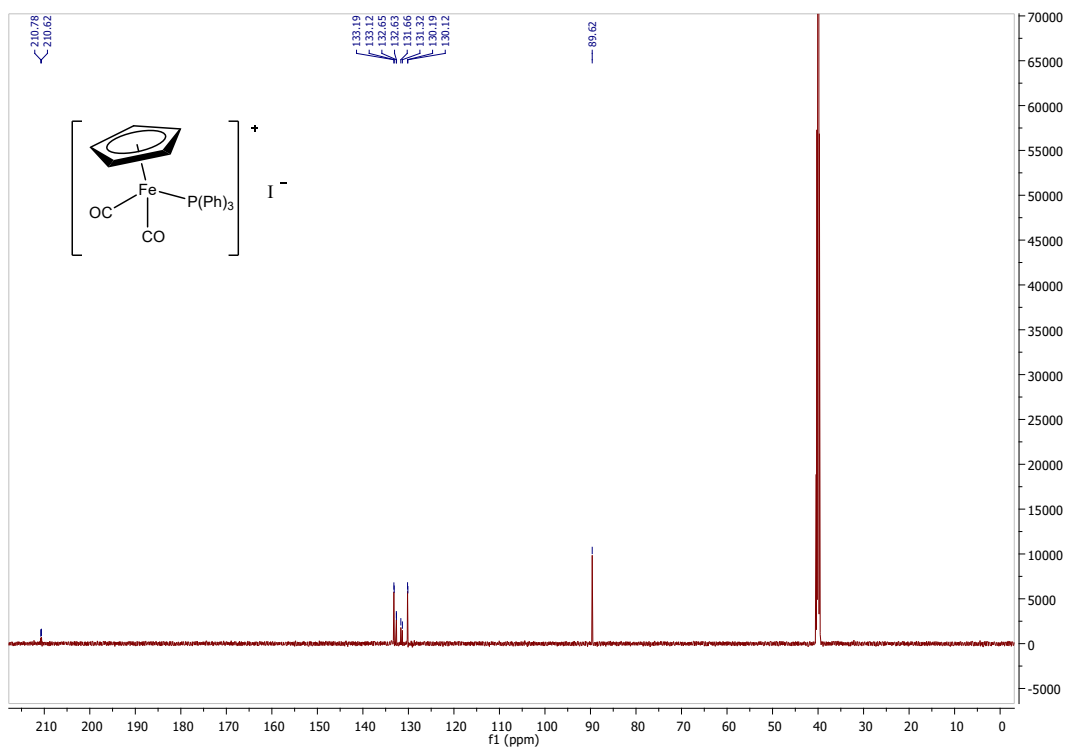

Figure S3. 151 MHz  $^{13}\text{C}$  NMR spectrum of **2** in DMSO

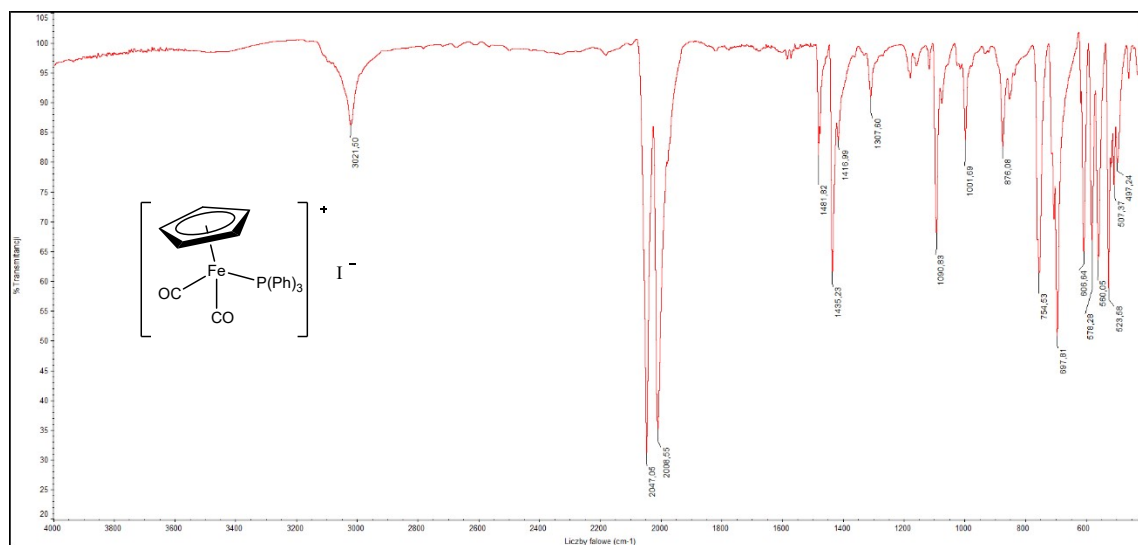

Figure S4. IR spectrum of **2** (KBr,  $\text{cm}^{-1}$ )

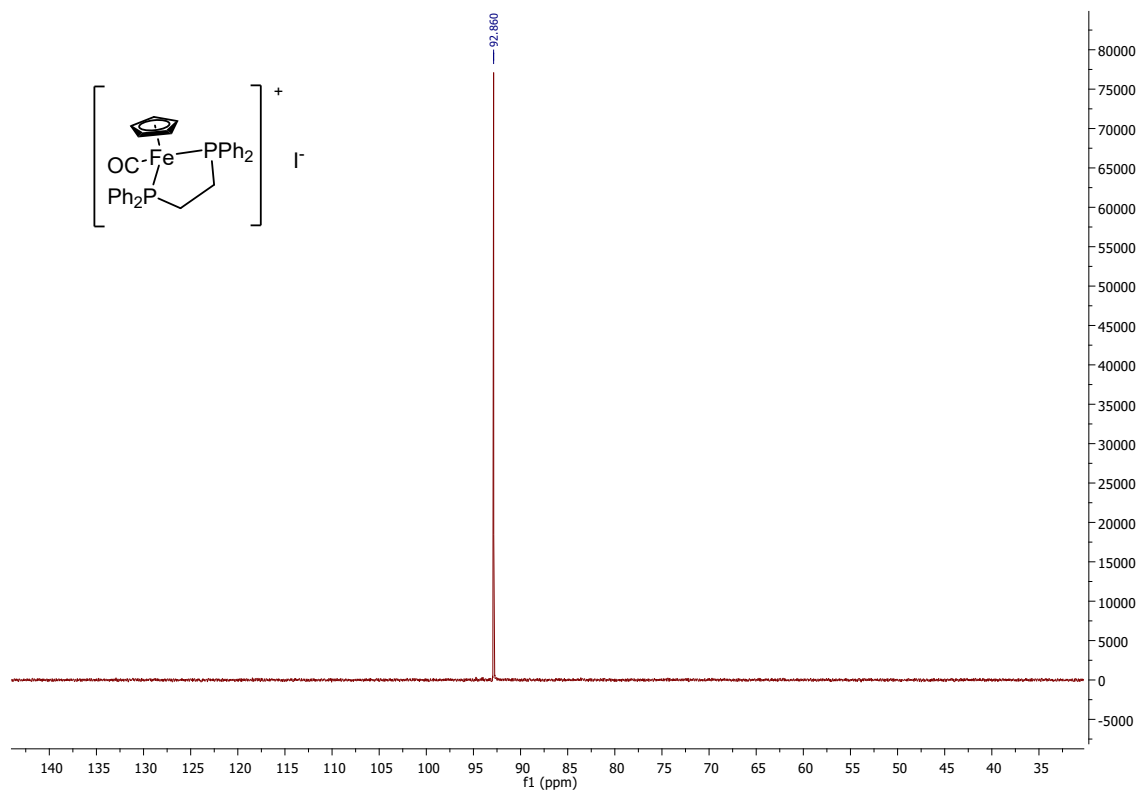

Figure S5. 243 MHz  $^{31}\text{P}$  NMR spectrum of **4** in DMSO

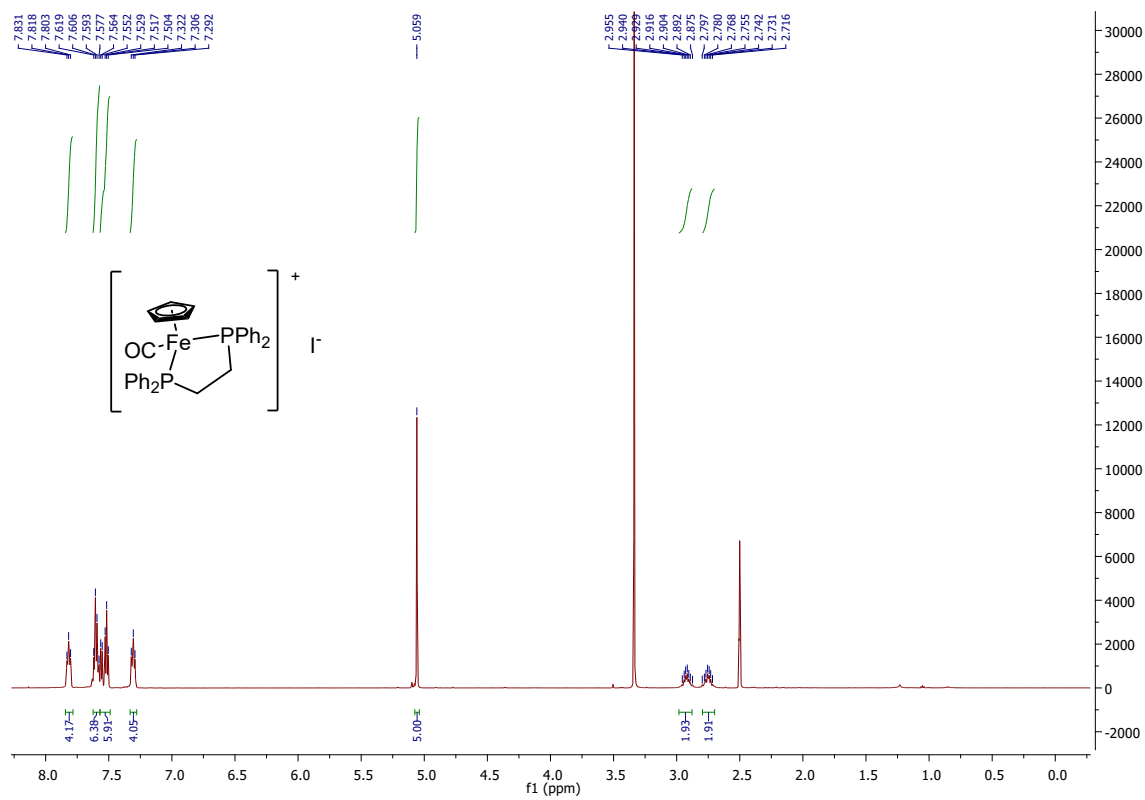

Figure S6. 600 MHz  $^1\text{H}$  NMR spectrum of **4** in DMSO

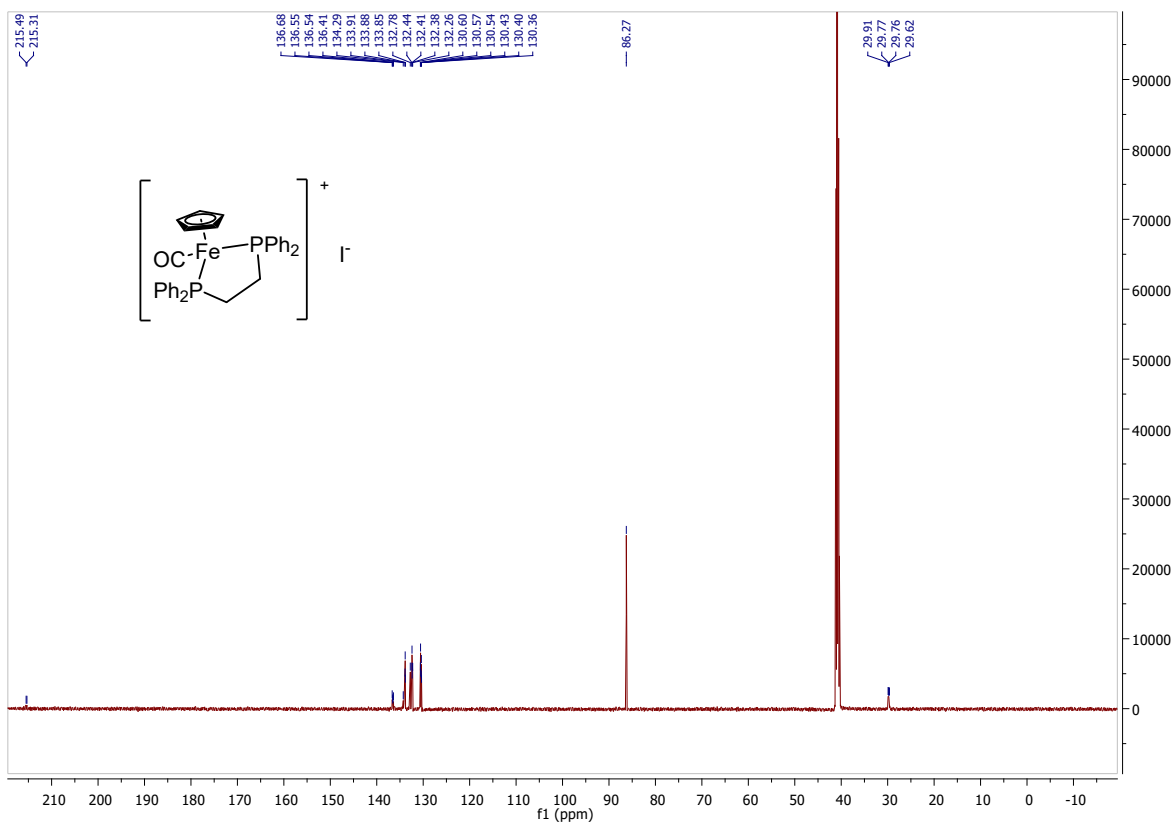

Figure S7. 151 MHz  $^{13}\text{C}$  NMR spectrum of **4** in MeOD

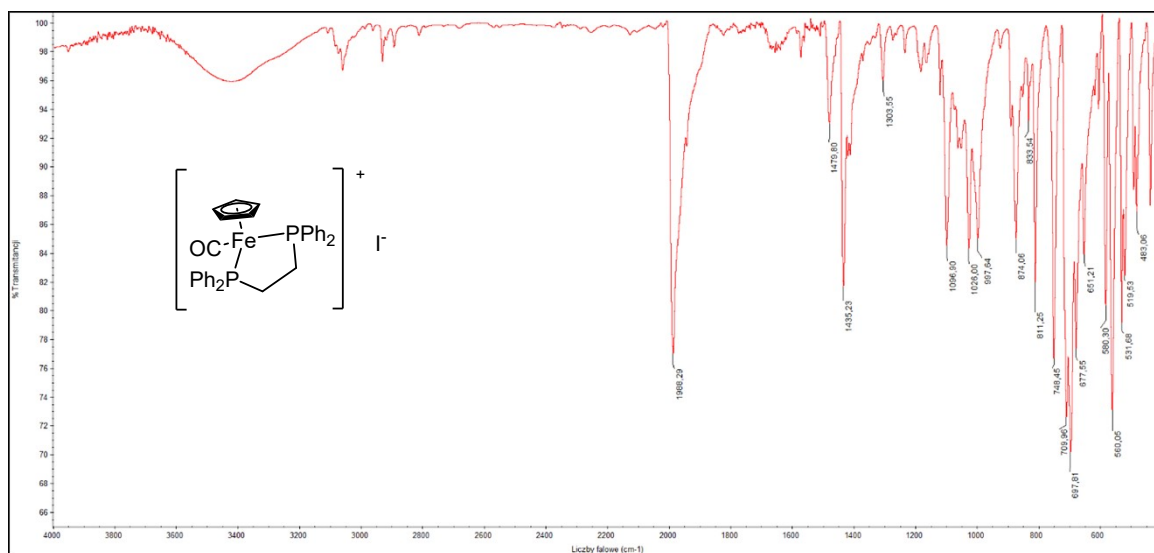

Figure S8. IR spectrum of **4** (KBr,  $\text{cm}^{-1}$ )

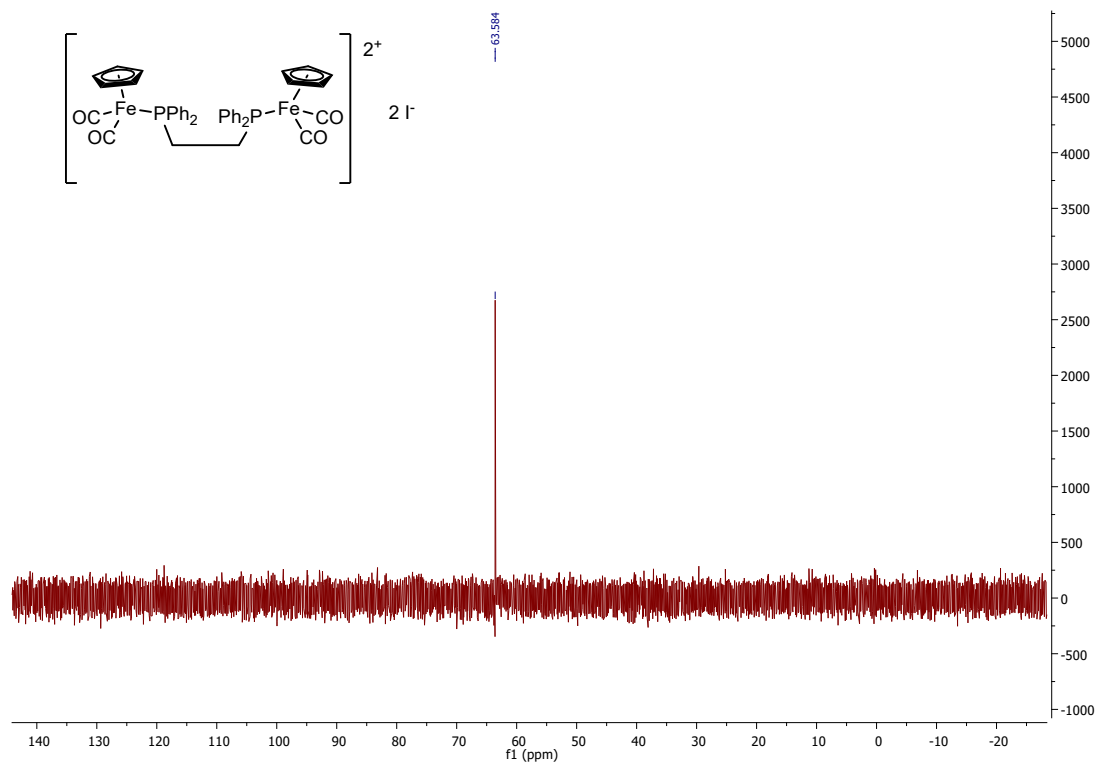

Figure S9. 243 MHz  $^{31}\text{P}$  NMR spectrum of 5 in DMSO

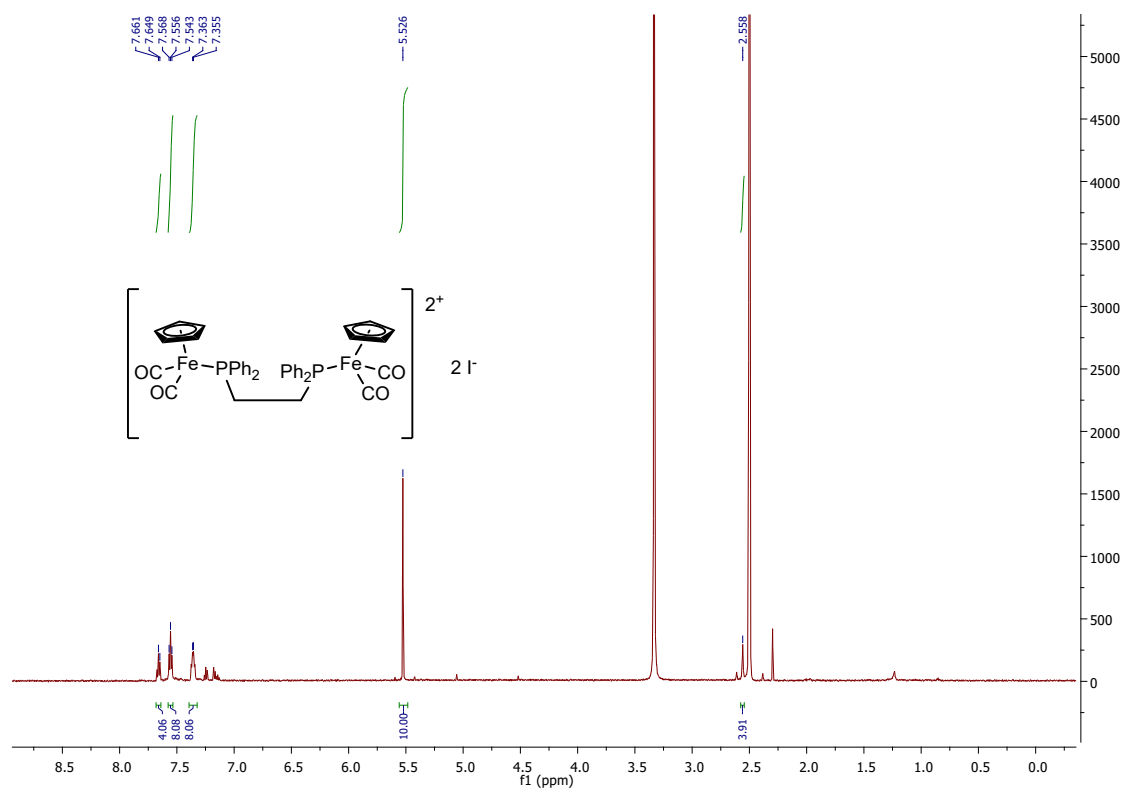

Figure S10. 600 MHz  $^1\text{H}$  NMR spectrum of 5 in DMSO

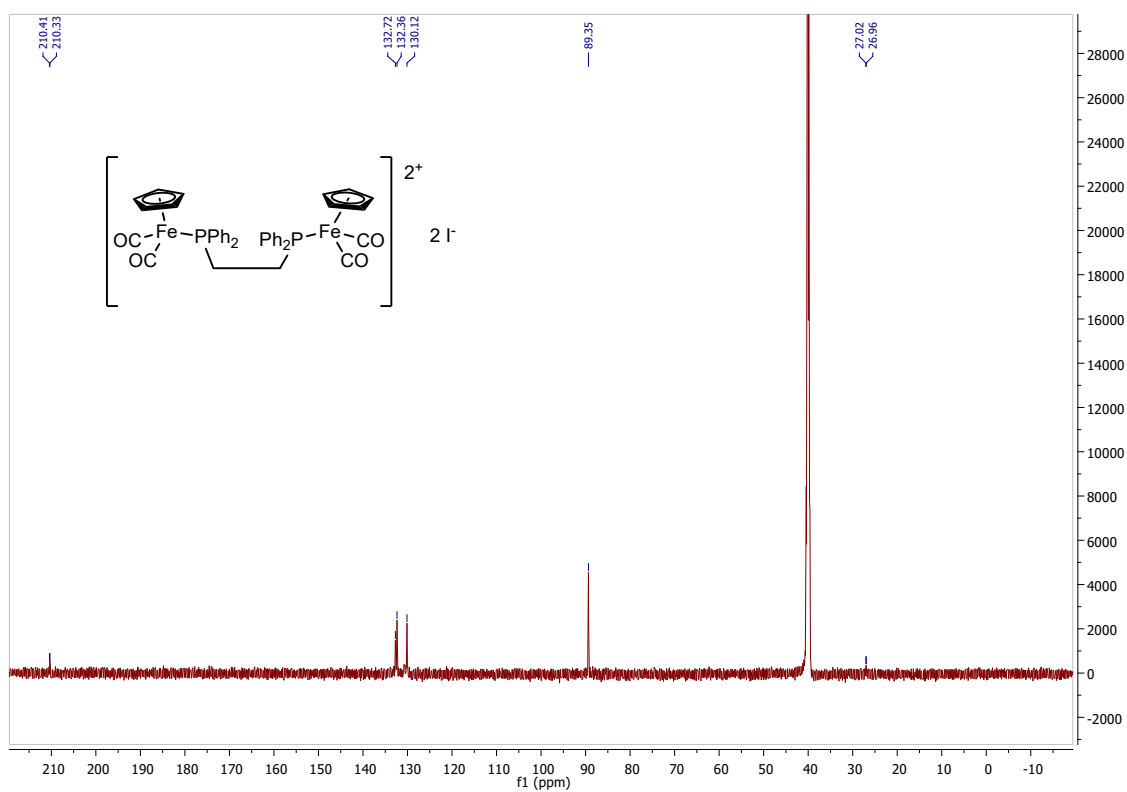

Figure S11. 151 MHz  $^{13}\text{C}$  NMR spectrum of 5 in DMSO

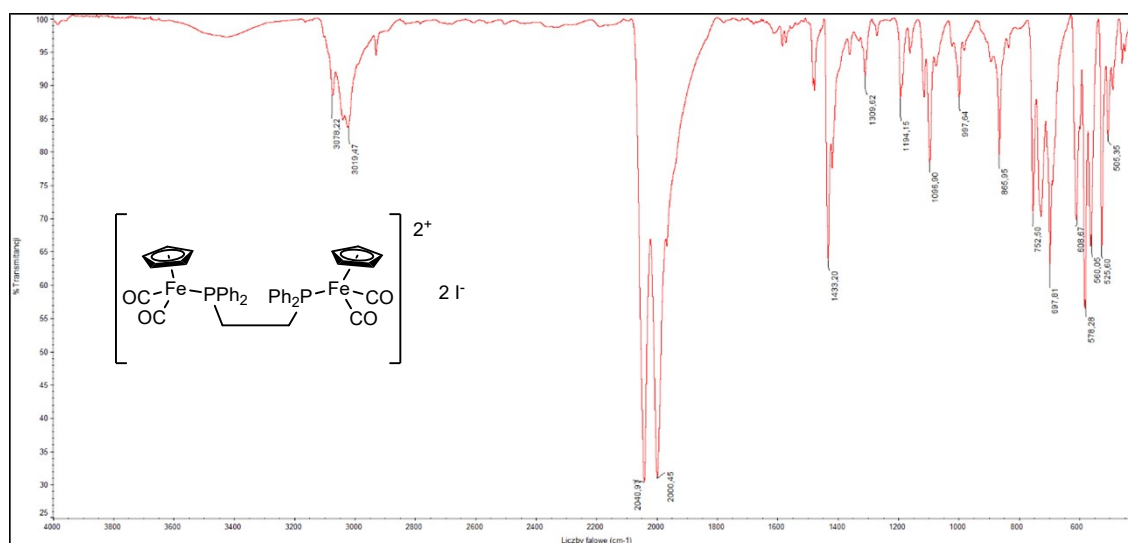

Figure S12. IR spectrum of 5 (KBr, cm $^{-1}$ )

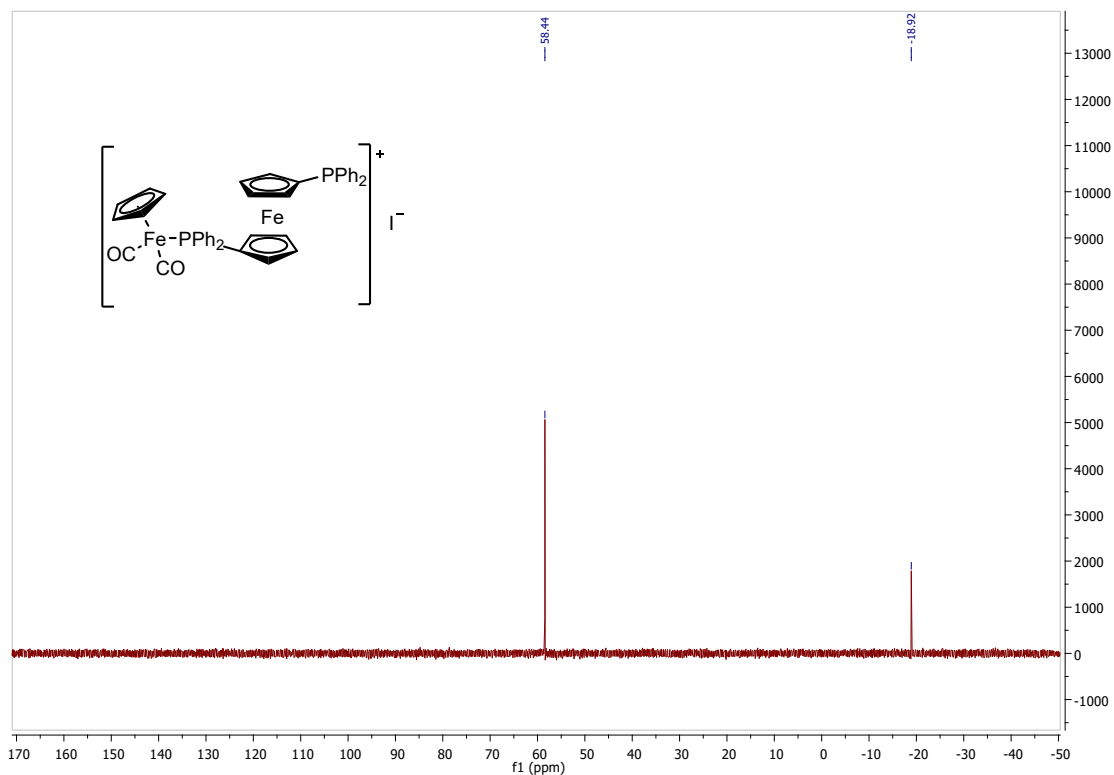

Figure S13. 243 MHz  $^{31}\text{P}$  NMR spectrum of **8** in  $\text{CDCl}_3$

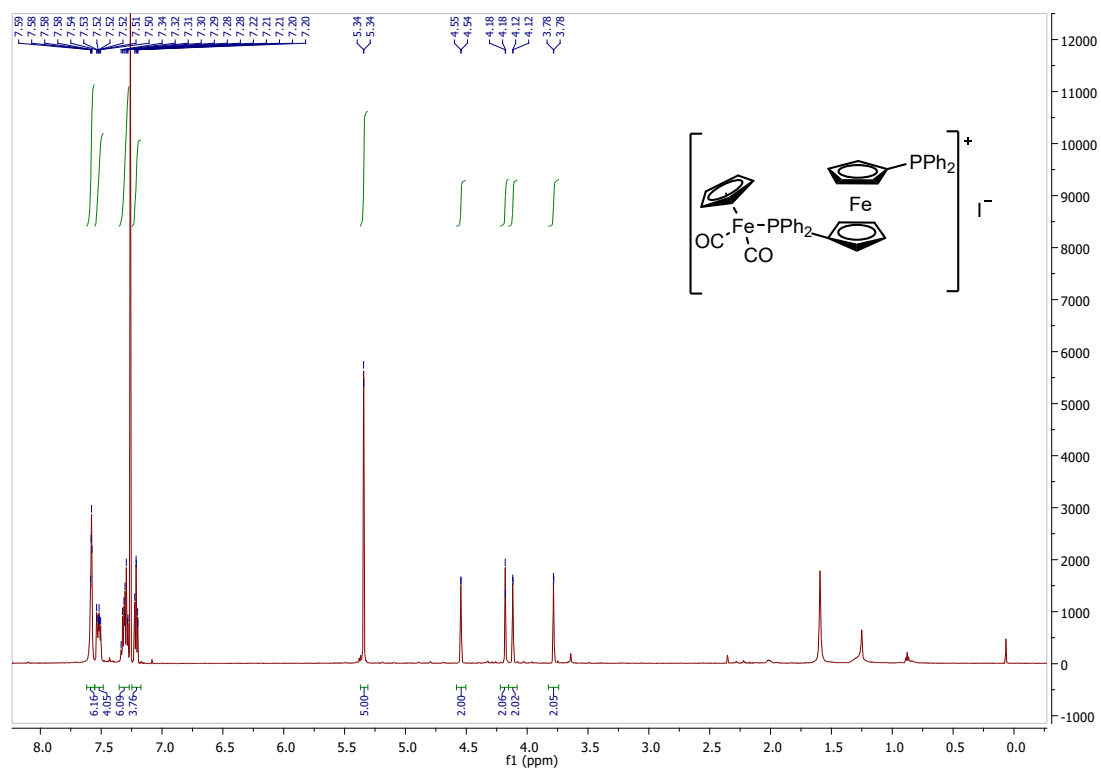

Figure S14. 600 MHz  $^1\text{H}$  NMR spectrum of **8** in  $\text{CDCl}_3$



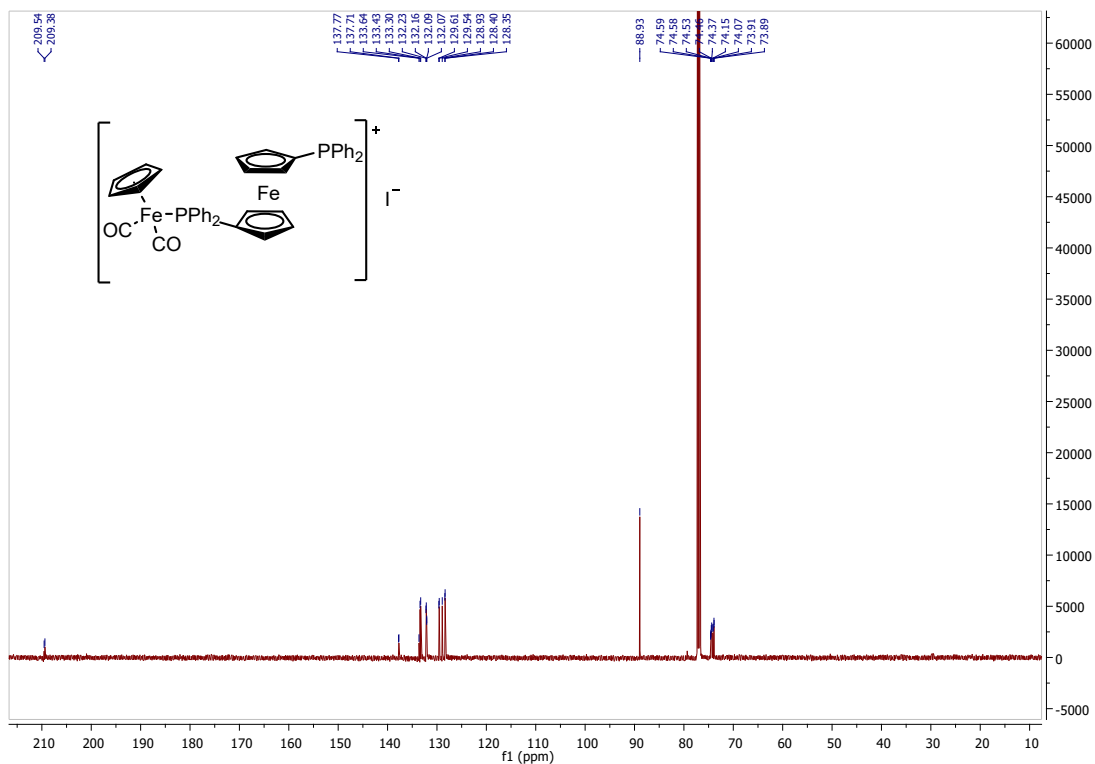

Figure S15. 151 MHz  $^{13}\text{C}$  NMR spectrum of **8** in  $\text{CDCl}_3$

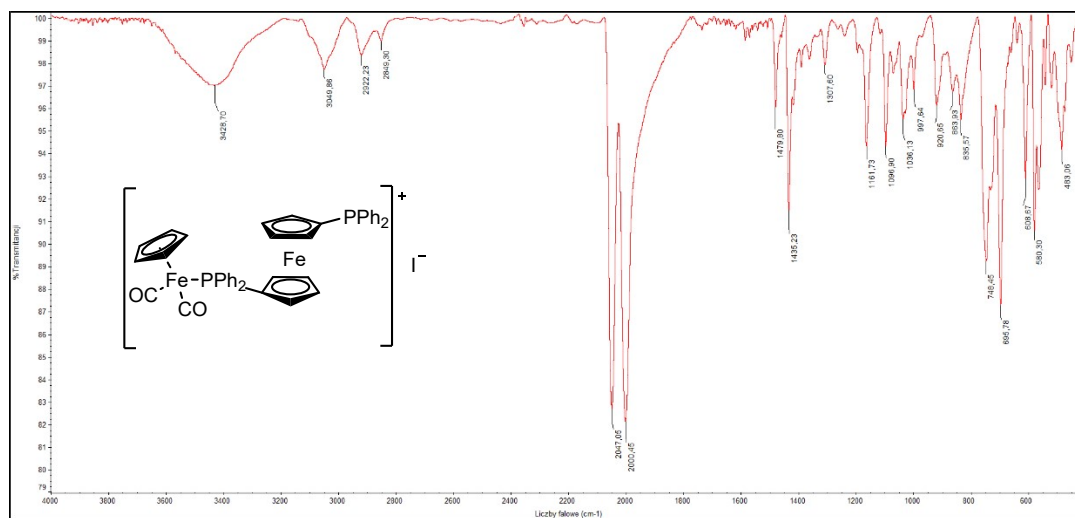

Figure S16. IR spectrum of **8** (KBr,  $\text{cm}^{-1}$ )

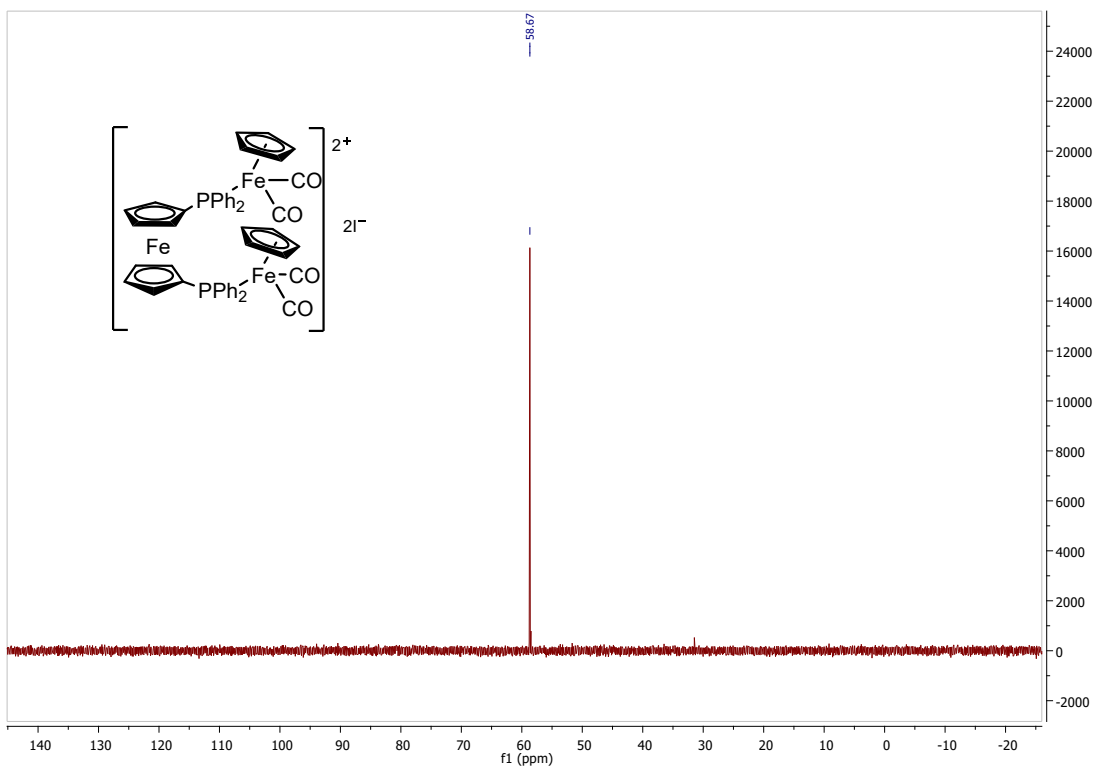

Figure S17. 243 MHz  $^{31}\text{P}$  NMR spectrum of **9** in MeOD

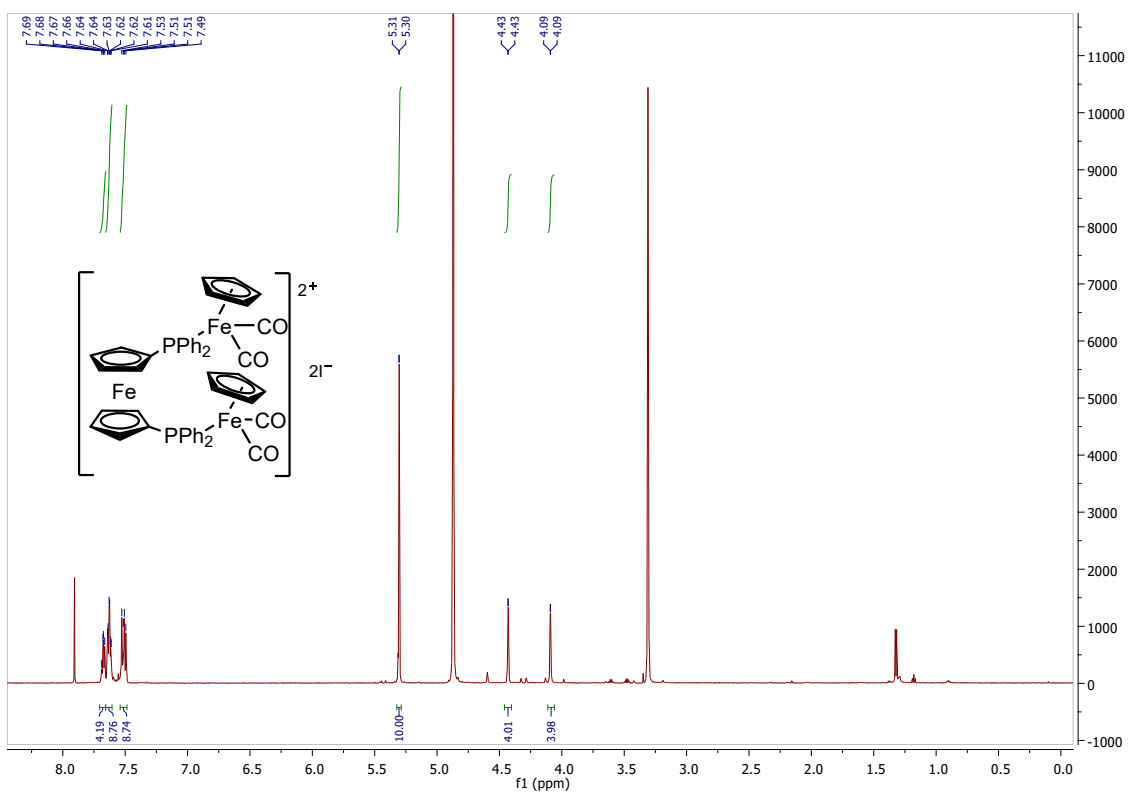

Figure S18. 600 MHz  $^1\text{H}$  NMR spectrum of **9** in MeOD

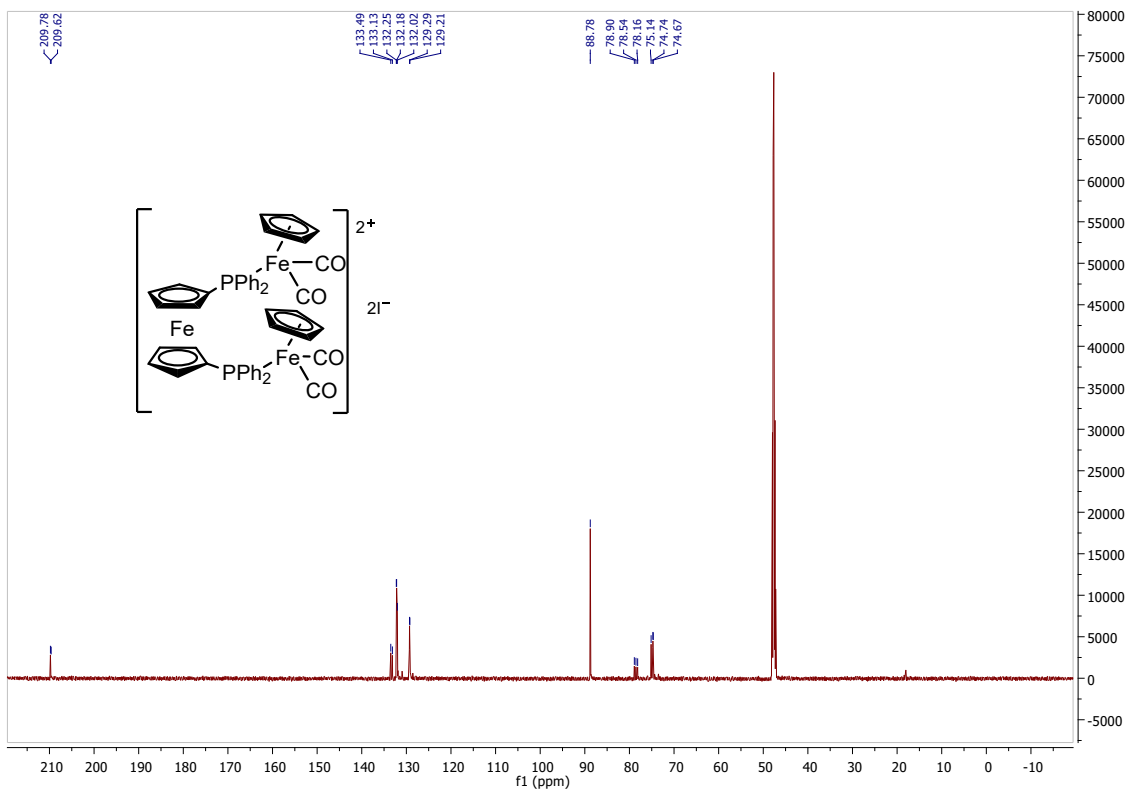

Figure S19. 151 MHz  $^{13}\text{C}$  NMR spectrum of **9** in MeOD

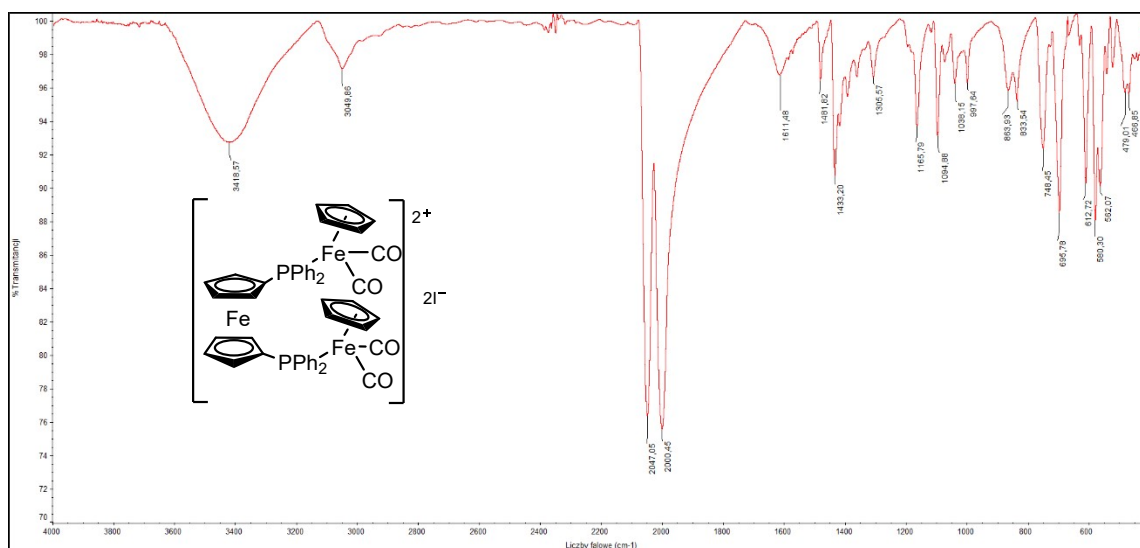

Figure S20. IR spectrum of **9** (KBr, cm<sup>-1</sup>)

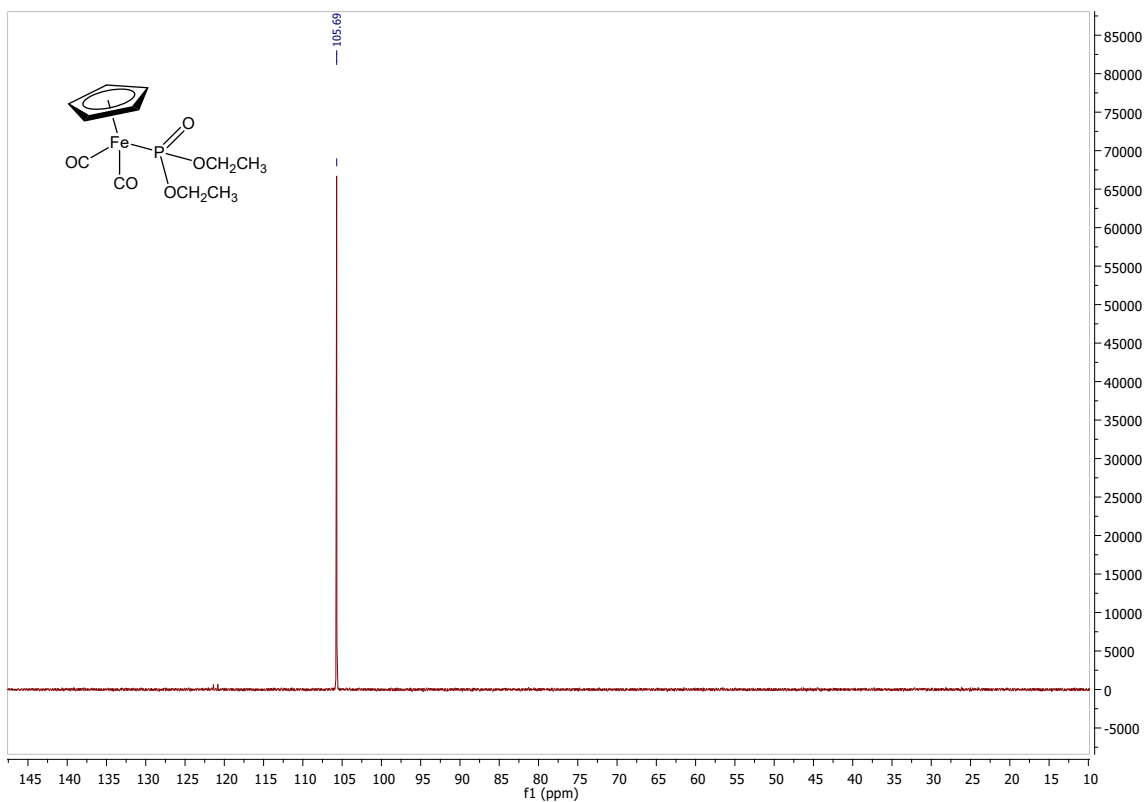

**Figure S21.** 243 MHz  $^{31}\text{P}$  NMR spectrum of **11** in  $\text{CDCl}_3$

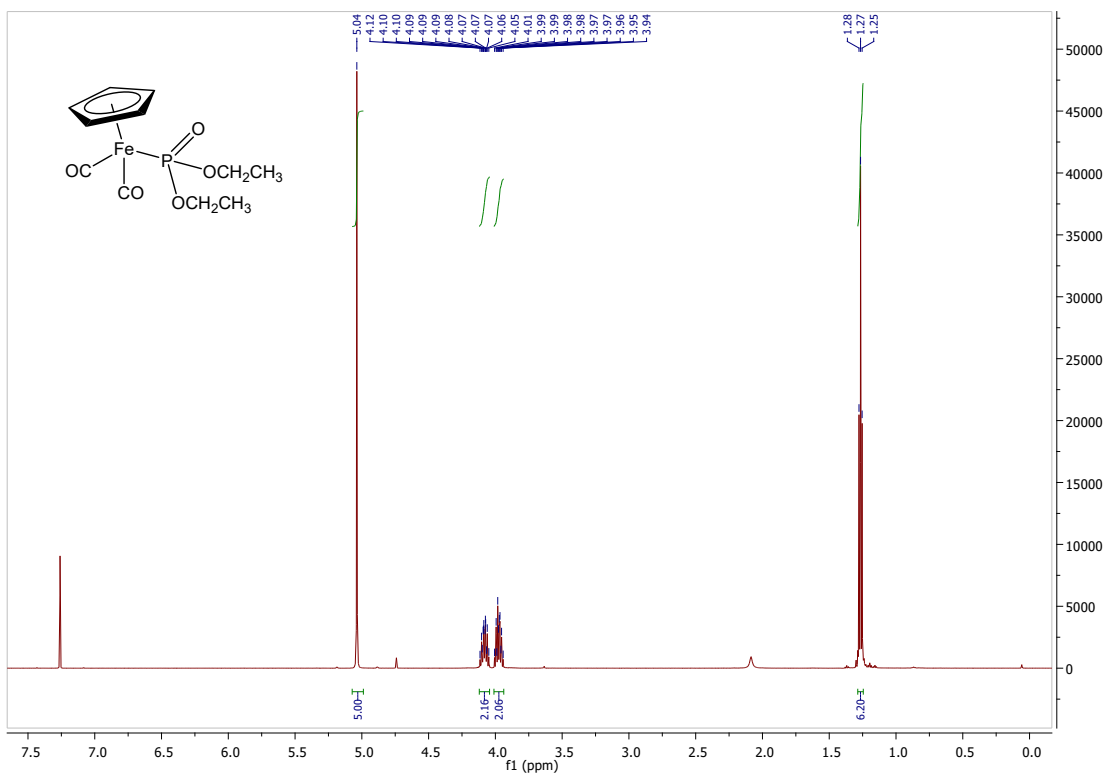

**Figure S22.** 600 MHz  $^1\text{H}$  NMR spectrum of **11** in  $\text{CDCl}_3$

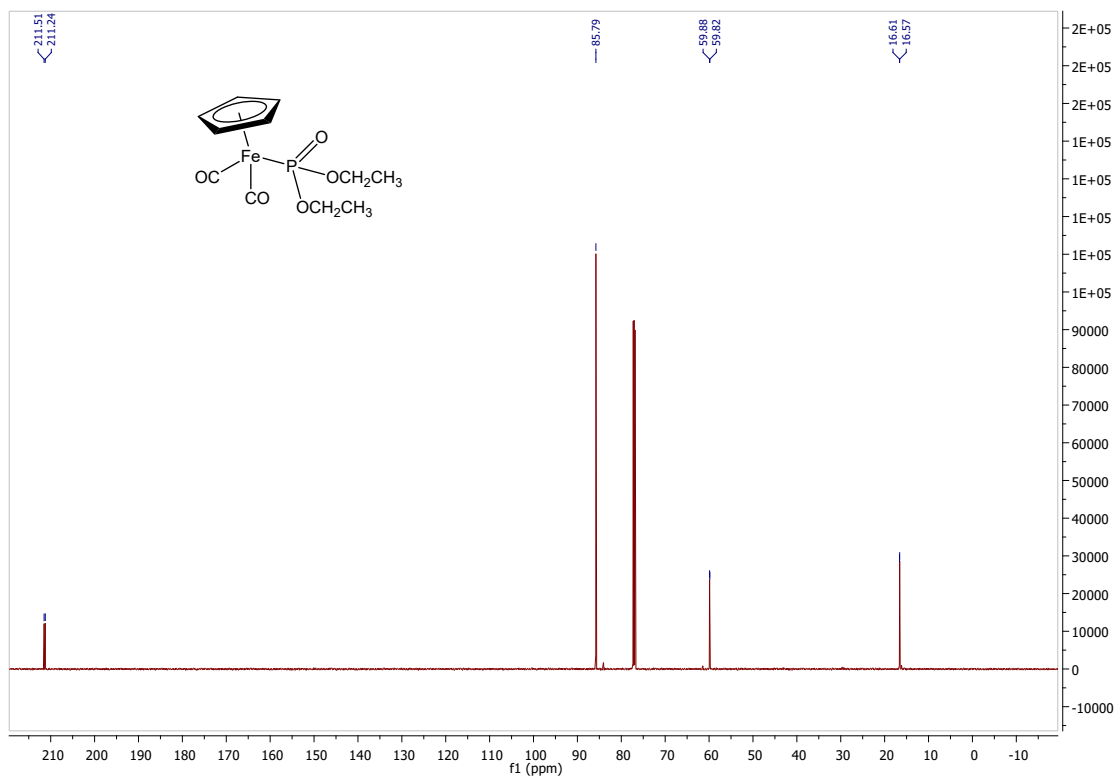

Figure S23. 151 MHz  $^{13}\text{C}$  NMR spectrum of **11** in  $\text{CDCl}_3$

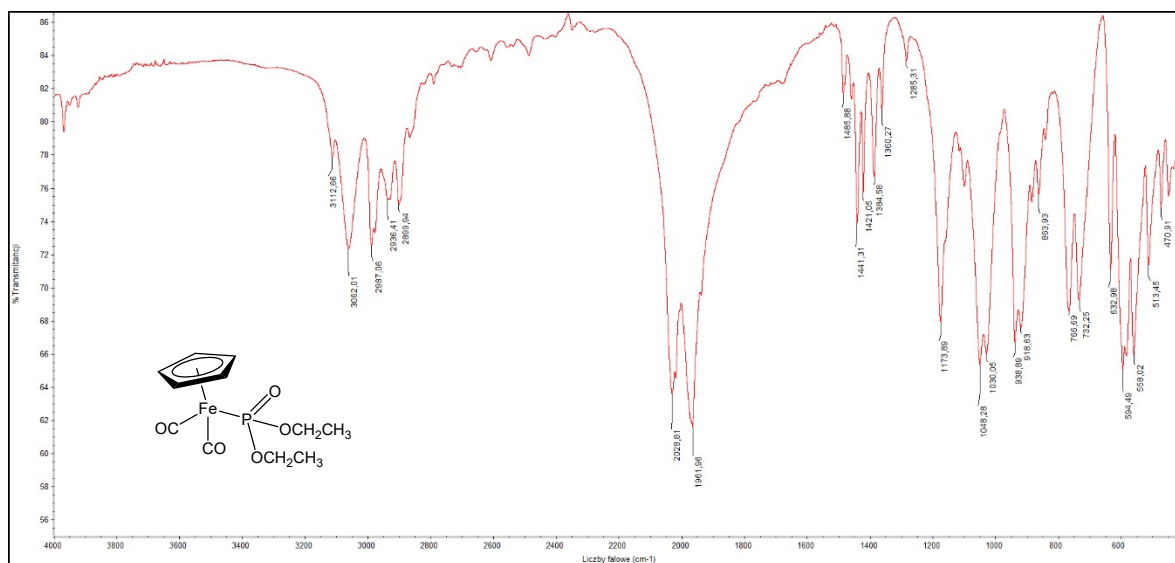

Figure S24. IR spectrum of **11** (KBr,  $\text{cm}^{-1}$ )

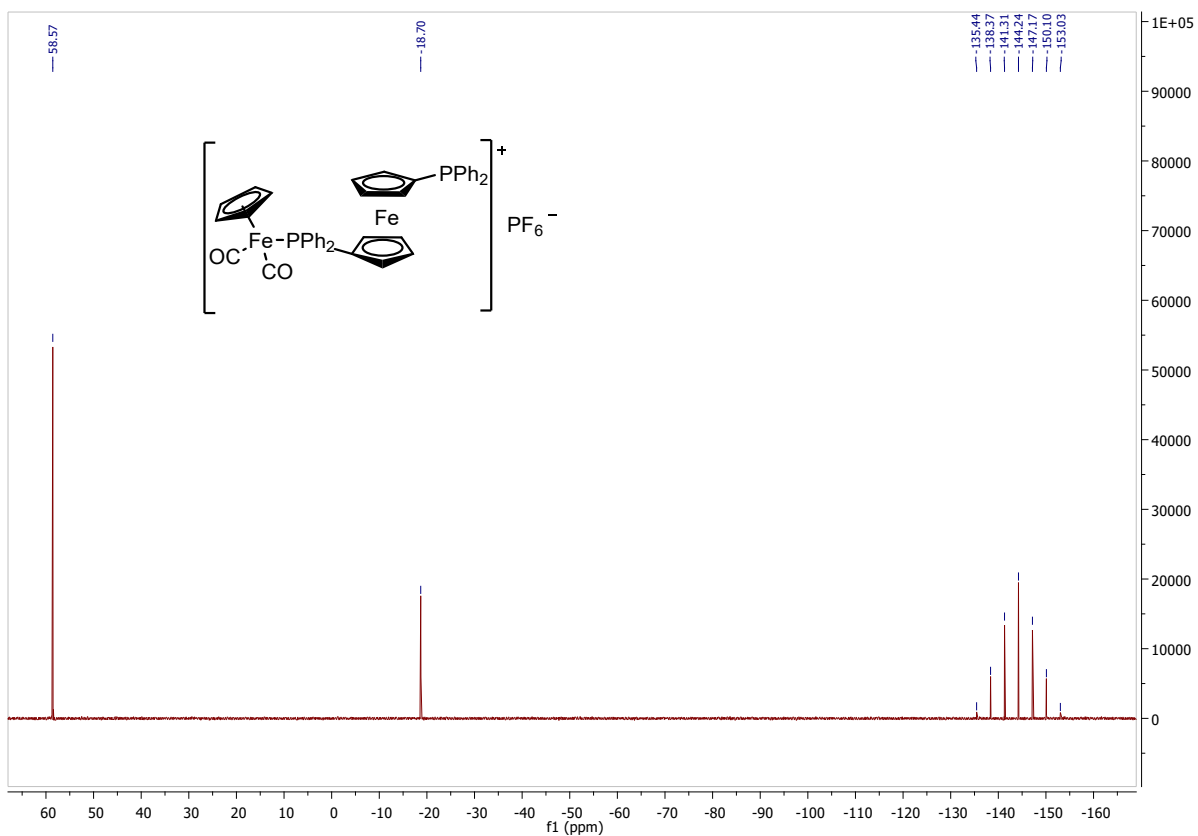

Figure S25. 243 MHz  $^{31}\text{P}$  NMR spectrum of **8a** in  $\text{CDCl}_3$

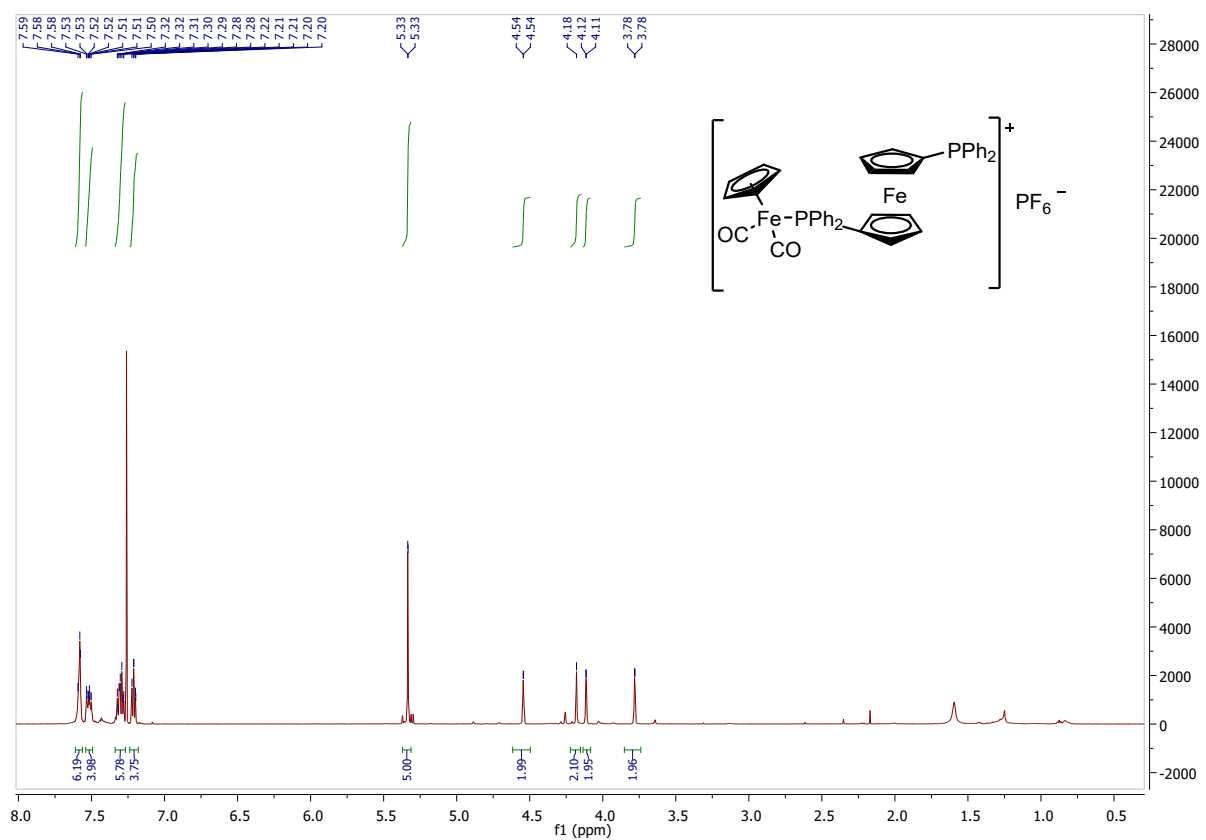

Figure S26. 600 MHz  $^1\text{H}$  NMR spectrum of **8a** in  $\text{CDCl}_3$

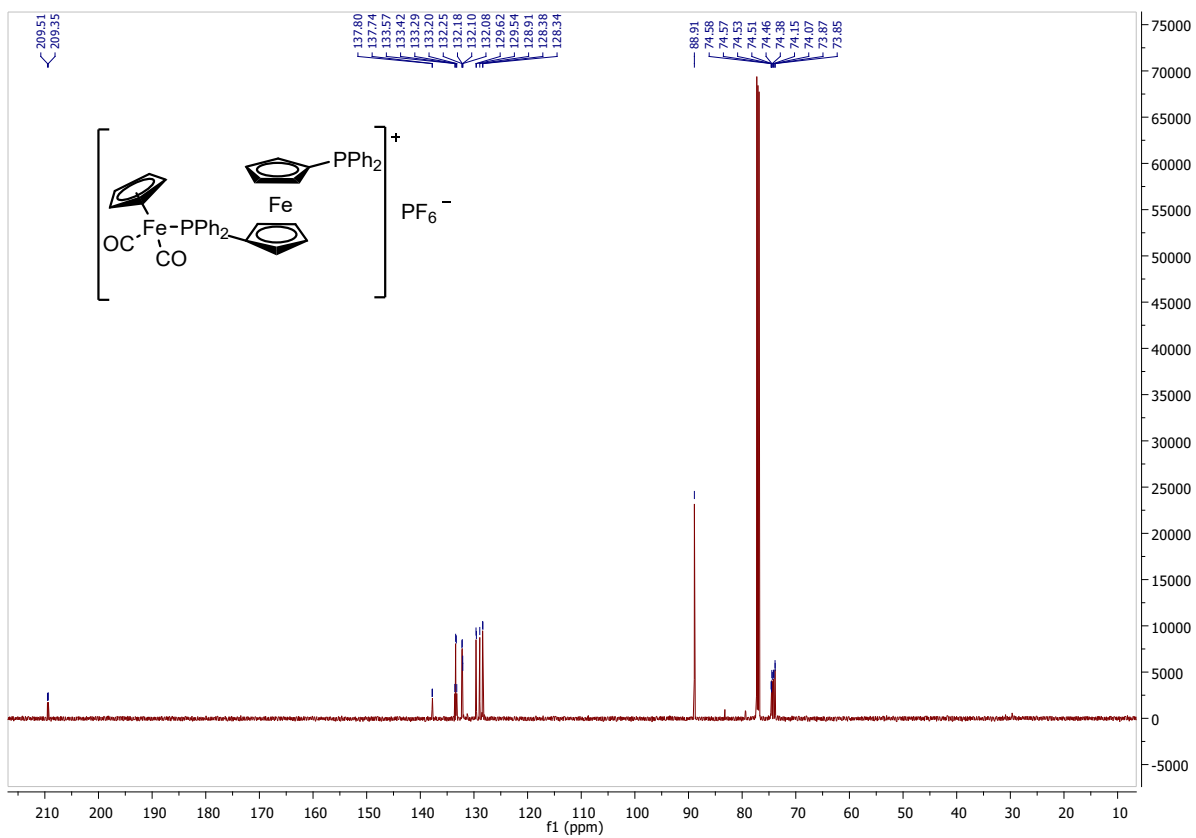

Figure S27. 151 MHz  $^{13}\text{C}$  NMR spectrum of **8a** in  $\text{CDCl}_3$

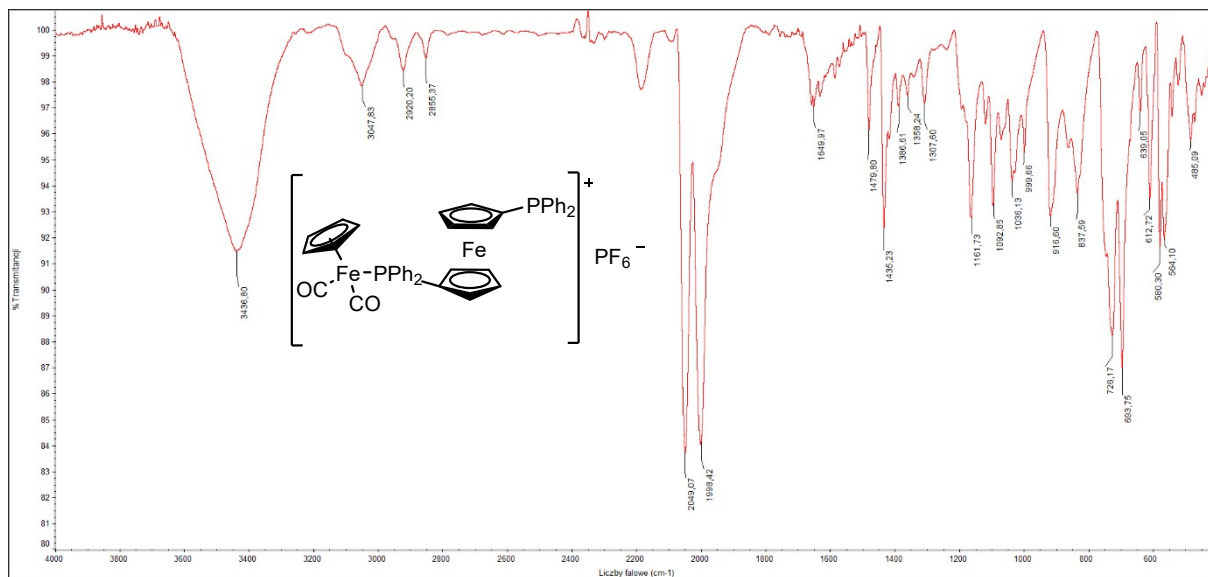

Figure S28. IR spectrum of **8a** (KBr,  $\text{cm}^{-1}$ )

**Table S1.** Crystal data and structure refinement details for **4**, **8a**, and **9**.

|                                             | <b>4</b>                                                                         | <b>8a</b>                                                                                                                                                       | <b>9</b>                                                                                                       |
|---------------------------------------------|----------------------------------------------------------------------------------|-----------------------------------------------------------------------------------------------------------------------------------------------------------------|----------------------------------------------------------------------------------------------------------------|
| Empirical formula                           | [C <sub>32</sub> H <sub>29</sub> FeOP <sub>2</sub> ] <sup>+</sup> I <sup>-</sup> | [C <sub>41</sub> H <sub>33</sub> Fe <sub>2</sub> O <sub>2</sub> P <sub>2</sub> ] <sup>+</sup> [PF <sub>6</sub> ] <sup>-</sup> · CH <sub>2</sub> Cl <sub>2</sub> | [C <sub>48</sub> H <sub>38</sub> Fe <sub>3</sub> O <sub>4</sub> P <sub>2</sub> ] <sup>2+</sup> 2I <sup>-</sup> |
| Formula weight / g·mol <sup>-1</sup>        | 674.24                                                                           | 961.21                                                                                                                                                          | 1162.07                                                                                                        |
| Crystal habit, colour                       | yellow plate                                                                     | orange prism                                                                                                                                                    | yellow block                                                                                                   |
| Crystal size/mm                             | 0.107 × 0.065 × 0.057                                                            | 0.7374 × 0.1169 × 0.0655                                                                                                                                        | 0.123 × 0.074 × 0.046                                                                                          |
| Crystal system, space group                 | monoclinic, <i>P2<sub>1</sub>/c</i>                                              | monoclinic, <i>P2<sub>1</sub>/n</i>                                                                                                                             | tetragonal / <i>I</i> <sup>2</sup> <i>d</i>                                                                    |
| a/Å                                         | 9.7064(2)                                                                        | 13.2746(9)                                                                                                                                                      | 21.4111(2)                                                                                                     |
| b/Å                                         | 14.0307(2)                                                                       | 10.8531(7)                                                                                                                                                      | 21.4111(2)                                                                                                     |
| c/Å                                         | 23.7668(5)                                                                       | 27.8509(18)                                                                                                                                                     | 19.0714(3)                                                                                                     |
| β/°                                         | 118.778(3)                                                                       | 91.081(7)                                                                                                                                                       | 90                                                                                                             |
| Volume/Å <sup>3</sup>                       | 2836.98(12)                                                                      | 4011.8(5)                                                                                                                                                       | 8743.0(2)                                                                                                      |
| Z / ρ <sub>x</sub> Mg/m <sup>3</sup>        | 4 / 1.579                                                                        | 4 / 1.591                                                                                                                                                       | 8 / 1.766                                                                                                      |
| μ /mm <sup>1</sup>                          | 14.052                                                                           | 1.041                                                                                                                                                           | 20.013                                                                                                         |
| F(000)                                      | 1352                                                                             | 1952                                                                                                                                                            | 4576                                                                                                           |
| Radiation/Å                                 | Cu Kα (λ = 1.54184)                                                              | MoKα (λ = 0.71073)                                                                                                                                              | Cu Kα (λ = 1.54184)                                                                                            |
| 2θ range /completeness                      | 7.596 – 152.964 / 99.8%                                                          | 2.654 – 25.000° / 99.99%                                                                                                                                        | 8.26 – 153.22 / 99.5%                                                                                          |
| Index ranges                                | -12 ≤ h ≤ 12,<br>-17 ≤ k ≤ 17,<br>-21 ≤ l ≤ 29                                   | -8 ≤ h ≤ 15<br>-11 ≤ k ≤ 12<br>-33 ≤ l ≤ 33                                                                                                                     | -26 ≤ h ≤ 18<br>-26 ≤ k ≤ 26<br>-24 ≤ l ≤ 23                                                                   |
| Reflections collected                       | 40468 [R <sub>int</sub> = 0.0307]                                                | 16129 [R <sub>int</sub> = 0.0827]                                                                                                                               | 37237 [R <sub>int</sub> = 0.0518]                                                                              |
| Data/restraints/parameters                  | 5952 / 0 / 334                                                                   | 7045 / 6 / 515                                                                                                                                                  | 4570 / 0 / 281                                                                                                 |
| Goodness-of-fit on F <sup>2</sup>           | 1.014                                                                            | 1.072                                                                                                                                                           | 1.042                                                                                                          |
| Final R indices [I ≥ 2σ (I)]                | R <sub>1</sub> = 0.0208 /<br>wR <sub>2</sub> = 0.0499                            | R <sub>1</sub> = 0.1159 /<br>wR <sub>2</sub> = 0.3093                                                                                                           | R <sub>1</sub> = 0.0413,<br>wR <sub>2</sub> = 0.1075                                                           |
| Final R indices [all data]                  | R <sub>1</sub> = 0.0238 /<br>wR <sub>2</sub> = 0.0517                            | R <sub>1</sub> = 0.1719 /<br>wR <sub>2</sub> = 0.3366                                                                                                           | R <sub>1</sub> = 0.0426,<br>wR <sub>2</sub> = 0.1086                                                           |
| Largest diff. peak/hole / e·Å <sup>-3</sup> | 0.31 / -0.68                                                                     | 2.41 / -1.45                                                                                                                                                    | 0.62/-1.02                                                                                                     |
| Flack parameter                             | -                                                                                | -                                                                                                                                                               | -0.002(3)                                                                                                      |
| CCDC number                                 | 2269767                                                                          | 2176904                                                                                                                                                         | 2269863                                                                                                        |



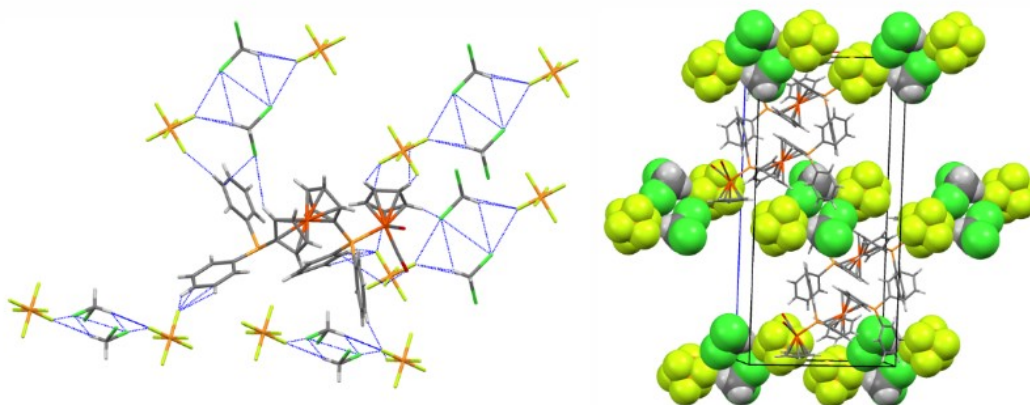

**Figure S29.** A single **8a** cation surrounded by  $\text{PF}_6^-$  hexafluorophosphate anions and solvent molecules (left). Dotted blue lines indicate intermolecular contacts of C-H...Cl, C-H...F hydrogen bonds and C-Cl...F halogen bonds. Crystal packing in unit cell (right). Tetramers of hexafluorophosphate anions and dichloromethane molecules are presented in space-fill style (atoms are presented as spheres corresponding to van der Waals atomic radii).

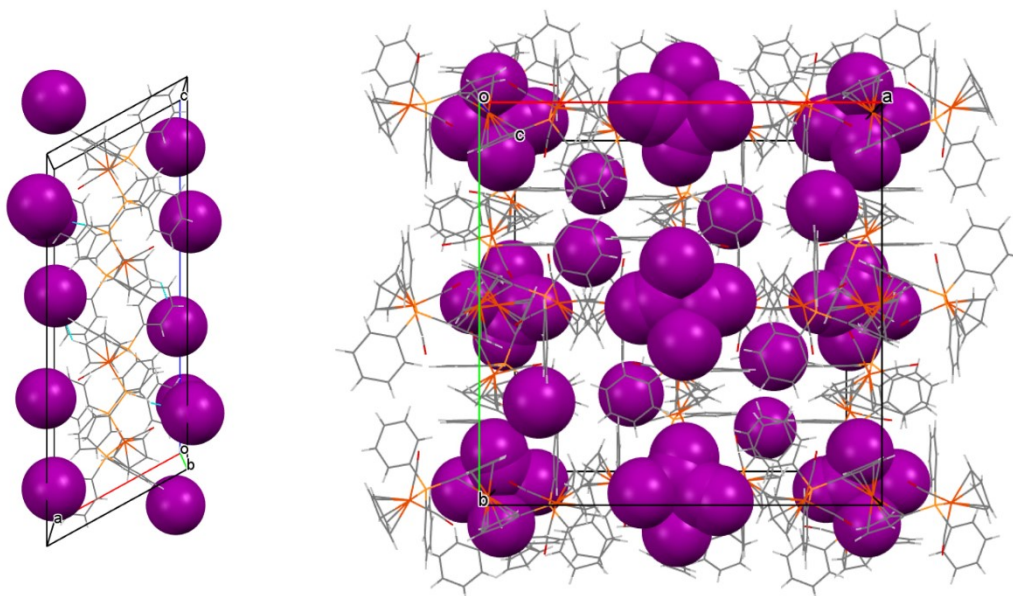

**Figure S30.** Crystal packing in unit cell (**4** left, **9** right). Iodine anions are presented in space-fill style (atoms are presented as spheres corresponding to van der Waals atomic radii).

Interatomic distances shorter than sum of corresponding van der Waals radii are presented in Hirshfeld molecular surface as red spots (compare **Figure S30** left). In turn, white areas show where molecules stick each other with distance equal to sum of van der Waals radii. As seen in the picture, all these areas results mainly from hydrogens contacts. The most numerous are H...H and H...C what is obvious (terminal atoms of molecules), but also large group represents H...F/Cl contacts for the **8a** cation and H...I for the **4** cation and **9** cation. These contacts are due to formation of C-H...F, C-H...Cl and C-H...I hydrogen bonds. The colored blue points in fingerprint plots (**Figure S32** right) indicate that in the case of the **8a** C-H...F are evidently shorter (peak about 1.4 Å) than C-H...Cl (peak about 1.8 Å). In the case of H...I contacts for the **4** and **9** (**Figure S31** right and **Figure S33** right), the

peak for the former is about 1.9 Å, while for the latter the two peaks can be observed: one about 1.9 Å and one about 1.6 Å. This double peak on the histogram for the H...I contacts is easy to explain. In the crystal structure of **9** are two I<sup>-</sup> anions. The longer distance is for the iodine anion I1 which forms two C-H...I hydrogen bonds with the shortest H...I contact of 3.014 Å. The shorter peak is for the I2 anion which is engaged in four hydrogen bonds with the shortest H...I contact of 2.219 Å, and additionally the position of this atom is disordered.

The corresponding plots also asymmetric as there are typical intermolecular contacts between various species: cation...anion (H...F and H...I), cation...solvent molecule (H...Cl).

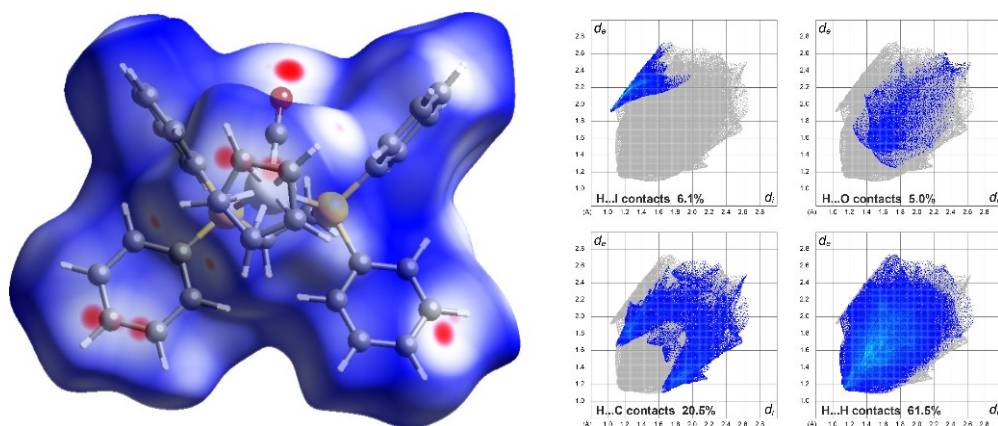

**Figure S31.** Hirshfeld surface of **4** cation by  $d_{\text{norm}}$  parameter (left) and fingerprint plot of hydrogen intermolecular contacts H...I, H...O, H...C and H...H with indicated percentage (right).

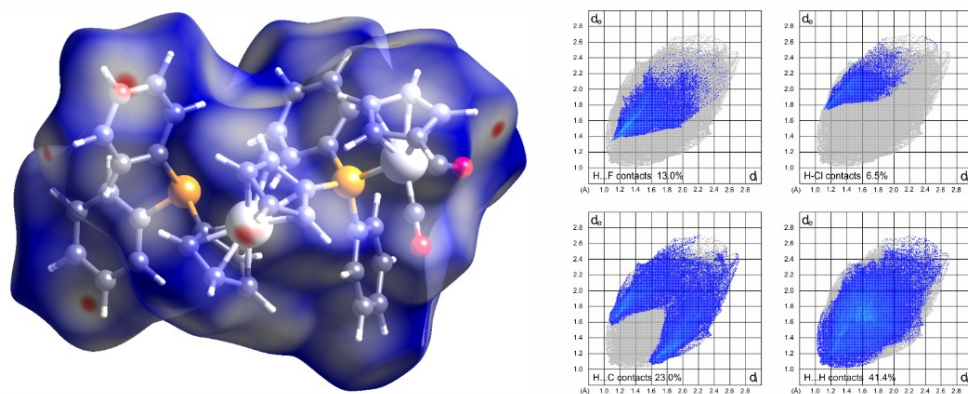

**Figure S32.** Hirshfeld surface of **8a** cation by  $d_{\text{norm}}$  parameter (left) and fingerprint plot of hydrogen intermolecular contacts H...F, H...Cl, H...C and H...H with indicated percentage (right).

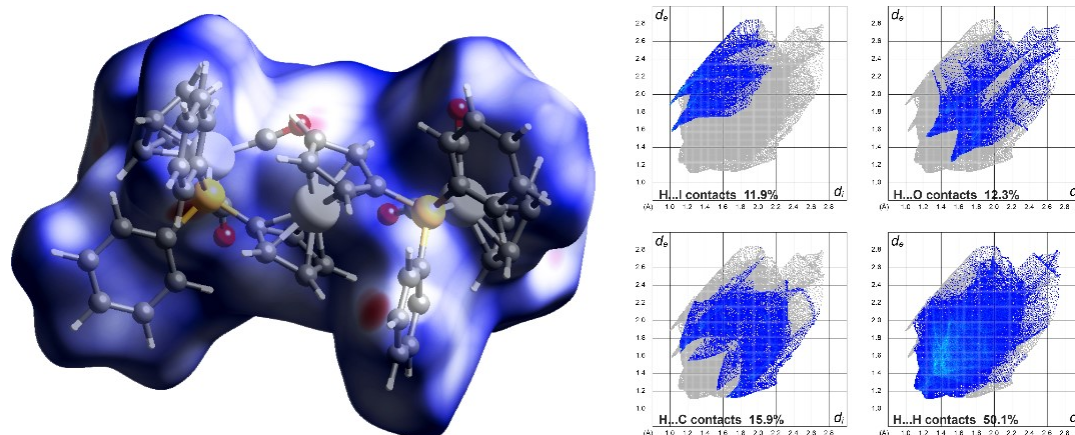

**Figure S33.** Hirshfeld surface of **9** cation by  $d_{\text{norm}}$  parameter (left) and fingerprint plot of hydrogen intermolecular contacts H...I, H...O, H...C and H...H with indicated percentage (right).

**Table S2.** Selected bond lengths [ $\text{\AA}$ ] and angles [ $^\circ$ ] for **8a**

| cation                        |           | anion     |          |
|-------------------------------|-----------|-----------|----------|
| Fe1-C1                        | 2.100(13) | F1-P10    | 1.564(9) |
| Fe1-C2                        | 2.117(12) | F2-P10    | 1.587(8) |
| Fe1-C3                        | 2.112(11) | F3-P10    | 1.590(9) |
| Fe1-C4                        | 2.092(11) | F4-P10    | 1.559(9) |
| Fe1-C5                        | 2.106(11) | F5-P10    | 1.580(9) |
| Fe1-Cg1 (C1-C2-C3-C4-C5)      |           | F6-P10    | 1.560(8) |
| Fe2-C11                       | 2.063(10) | F6-P10-F4 | 89.0(6)  |
| Fe2-C12                       | 2.067(10) | F6-P10-F1 | 90.4(6)  |
| Fe2-C13                       | 2.046(11) | F4-P10-F1 | 89.0(6)  |
| Fe2-C14                       | 2.066(11) | F6-P10-F5 | 179.0(6) |
| Fe2-C15                       | 2.061(11) | F4-P10-F5 | 91.5(6)  |
| Fe2-Cg2 (C11-C12-C13-C14-C15) |           | F1-P10-F5 | 88.8(6)  |
| Fe2-C16                       | 2.061(10) | F6-P10-F2 | 90.4(5)  |
| Fe2-C17                       | 2.037(11) | F4-P10-F2 | 177.5(6) |
| Fe2-C18                       | 2.037(11) | F1-P10-F2 | 88.6(5)  |
| Fe2-C19                       | 2.059(12) | F5-P10-F2 | 89.0(5)  |
| Fe2-C20                       | 2.042(11) | F6-P10-F3 | 90.1(5)  |
| Fe2-Cg2 (C16-C17-C18-C19-C20) |           | F4-P10-F3 | 92.3(5)  |
| Fe1-C6                        | 1.792(14) | F1-P10-F3 | 178.6(5) |
| O6-C6                         | 1.123(14) | F5-P10-F3 | 90.7(5)  |
| Fe1-C7                        | 1.744(19) | F2-P10-F3 | 90.2(5)  |
| C7-O7                         | 1.200(18) |           |          |

|            |           |                |           |
|------------|-----------|----------------|-----------|
| Fe1-P1     | 2.228(3)  | <b>solvent</b> |           |
| P1-C11     | 1.805(10) | Cl1-C10        | 1.818(18) |
| P1-C21     | 1.825(11) | Cl2-C10        | 1.809(19) |
| P1-C31     | 1.823(12) | Cl2-C10-Cl1    | 106.8(9)  |
| P2-C16     | 1.827(12) |                |           |
| P2-C41     | 1.834(12) |                |           |
| P2-C51     | 1.819(10) |                |           |
| C7-Fe1-C6  | 93.3(6)   |                |           |
| C7-Fe1-P1  | 91.7(4)   |                |           |
| C6-Fe1-P1  | 90.8(3)   |                |           |
| C11-P1-C21 | 105.0(5)  |                |           |
| C11-P1-C31 | 109.3(5)  |                |           |
| C21-P1-C31 | 103.8(5)  |                |           |
| C11-P1-Fe1 | 107.6(3)  |                |           |
| C21-P1-Fe1 | 117.0(4)  |                |           |
| C31-P1-Fe1 | 113.6(4)  |                |           |
| C51-P2-C16 | 101.2(5)  |                |           |
| C51-P2-C41 | 102.4(5)  |                |           |
| C16-P2-C41 | 101.9(5)  |                |           |

**Table S3.** Selected bond lengths [Å] and angles [°] for **4**

| <b>4 - cation</b>        |           |
|--------------------------|-----------|
| Fe1-C1                   | 2.095(2)  |
| Fe1-C2                   | 2.104(2)  |
| Fe1-C3                   | 2.113(2)  |
| Fe1-C4                   | 2.105(2)  |
| Fe1-C5                   | 2.094(2)  |
| Fe1-Cg1 (C1-C2-C3-C4-C5) |           |
| Fe1-C6                   | 1.756(2)  |
| O6-C6                    | 1.146(3)  |
| Fe1-P1                   | 2.2077(6) |
| P1-C7                    | 1.843(2)  |
| P1-C9                    | 1.825(2)  |
| P1-C15                   | 1.829(2)  |
| Fe1-P2                   | 2.2062(6) |
| P2-C8                    | 1.842(2)  |
| P2-C21                   | 1.825(2)  |
| P2-C27                   | 1.825(2)  |
| P1-Fe1-P2                | 87.76(2)  |

|            |           |
|------------|-----------|
| P1-Fe1-C6  | 90.63(6)  |
| P2-Fe1-C6  | 86.27(6)  |
| Fe1-P1-C7  | 107.82(6) |
| Fe1-P1-C9  | 113.53(6) |
| Fe1-P1-C15 | 121.05(6) |
| C7-P1-C9   | 107.41(9) |
| C7-P1-C15  | 104.06(9) |
| C9-P1-C15  | 101.94(9) |
| Fe1-P2-C8  | 106.63(6) |
| Fe1-P2-C21 | 113.88(6) |
| Fe1-P2-C27 | 119.66(6) |
| C8-P2-C21  | 104.69(9) |
| C8-P2-C27  | 106.11(9) |
| C21-P2-C27 | 104.69(9) |

**Table S4.** Selected bond lengths [Å] and angles [°] for **9**

| <b>9 - cation</b>           |          |
|-----------------------------|----------|
| Fe1-C1                      | 2.104(8) |
| Fe1-C2                      | 2.103(7) |
| Fe1-C3                      | 2.110(7) |
| Fe1-C4                      | 2.091(6) |
| Fe1-C5                      | 2.104(7) |
| Fe1-Cg1 (C1-C2-C3-C4-C5)    |          |
| Fe2-C8                      | 2.045    |
| Fe2-C9                      | 2.039    |
| Fe2-C10                     | 2.054    |
| Fe2-C11                     | 2.077    |
| Fe2-C12                     | 2.07     |
| Fe2-Cg2 (C8-C9-C10-C11-C12) |          |
| Fe1-C6                      | 1.786(8) |
| O6-C6                       | 1.10(1)  |
| Fe1-C7                      | 1.799(9) |
| O7-C7                       | 1.05(1)  |
| Fe1-P1                      | 2.241(2) |
| P1-C8                       | 1.792(7) |
| P1-C13                      | 1.823(6) |
| P1-C19                      | 1.822(7) |
| P1-Fe1-C6                   | 96.3(2)  |
| P1-Fe1-C7                   | 89.5(3)  |
| C6-Fe1-C7                   | 95.9(4)  |
| Fe1-P1-C8                   | 114.4(2) |

|            |          |
|------------|----------|
| Fe1-P1-C13 | 118.1(2) |
| Fe1-P1-C19 | 110.7(2) |
| C13-P1-C8  | 105.1(3) |
| C19-P1-C8  | 102.2(3) |
| C19-P1-C13 | 104.8(3) |

**Table S5.** Geometric parameters of hydrogen and halogen bonds in crystal structure **8a**, **4** and **9**.

| hydrogen bonds  | D-H       | H...A     | D...A     | D-H.....A | symmetry code          |
|-----------------|-----------|-----------|-----------|-----------|------------------------|
| <b>8a</b>       |           |           |           |           |                        |
| C4-H4...Cl2     | 0.93      | 3.01      | 3.673(15) | 129.7(8)  | -x,-y,-z               |
| C10-H101... Cl2 | 0.93      | 3.15      | 3.786(16) | 124.9(8)  | -x,2-y,-z              |
| C17-H17... Cl1  | 0.93      | 3.05      | 3.857(15) | 145.6(7)  | x,y,z                  |
| C24-H24...Cl1   | 0.93      | 3.00      | 3.858(13) | 154.4(8)  | x,+y-1,+z              |
| C35-H35...O6    | 0.93      | 2.79      | 3.429(15) | 126.9(8)  | -x+1/2+1,+y-1/2,-z+1/2 |
| C55-H55...O7    | 0.93      | 2.92      | 3.470(16) | 119.1(8)  | x-1,+y,+z              |
| C56-H56...O7    | 0.93      | 2.67      | 3.342(15) | 130.3(7)  | x-1,+y,+z              |
| C1-H1...F3      | 0.93      | 2.63      | 3.373(15) | 137.7(8)  | -x+1,-y+1,-z           |
| C1-H1...F6      | 0.93      | 2.91      | 3.352(15) | 110.7(7)  | x-1,+y,+z              |
| C2-H2...F6      | 0.93      | 2.70      | 3.333(14) | 126.4(7)  | x,y,z                  |
| C3-H3...F1      | 0.93      | 2.77      | 3.575(16) | 145.3(8)  | x,y,z                  |
| C3-H3...F4      | 0.93      | 2.72      | 3.449(16) | 135.3(8)  | x,y,z                  |
| C5-H5...F3      | 0.93      | 2.59      | 3.507(15) | 167.2(8)  | x,+y-1,+z              |
| C10-H101 ...F5  | 0.93      | 2.37      | 3.324(21) | 168.6(9)  | x-1,+y,+z              |
| C12-H12...F4    | 0.93      | 2.71      | 3.197(14) | 113.4(7)  | x-1,+y,+z              |
| C25-H25...F6    | 0.93      | 2.93      | 3.664(15) | 136.3(8)  | x,+y-1,+z              |
| C25-H25...F3    | 0.93      | 2.84      | 3.405(15) | 119.9(8)  | x,+y-1,+z              |
| C26-H26...F3    | 0.93      | 2.68      | 3.326(14) | 127.2(7)  | x,+y-1,+z              |
| C26-H26...F2    | 0.93      | 2.87      | 3.350(14) | 112.9 (7) | x,+y-1,+z              |
| C34-H34...F1    | 0.93      | 2.82      | 3.725(16) | 165.9(8)  | -x+1/2+1,+y-1/2,-z+1/2 |
| C43-H43...F1    | 0.93      | 2.61      | 3.540(16) | 175.4(8)  | x-1,+y,+z              |
| C45-H45...F4    | 0.93      | 2.91      | 3.393(17) | 114.1(8)  | x-1,+y,+z              |
| C45-H45...F5    | 0.93      | 2.91      | 3.750(16) | 151.5(8)  | x-1,+y,+z              |
| C53-H53...F2    | 0.93      | 2.69      | 3.306(14) | 124.4(7)  | -x+1/2,+y-1/2,-z+1/2   |
| C54-H54...F2    | 0.93      | 2.71      | 3.318(13) | 123.7(7)  | -x+1/2,+y-1/2,-z+1/2   |
| halogen bonds   | R-X       | X...Y     |           | R-X.....Y | symmetry code          |
| C10-Cl2....F5   | 1.808(14) | 3.012(12) |           | 159.7(7)  |                        |
| hydrogen bonds  | D-H       | H...A     | D...A     | D-H.....A | symmetry code          |

| <b>4</b>     |      |       |          |       |                 |
|--------------|------|-------|----------|-------|-----------------|
| C4-H4...l1   | 0.95 | 3.158 | 3.849(2) | 131.0 | x,y,z           |
| C3-H3...l1   | 0.95 | 3.162 | 4.073(2) | 161.1 | 2-x,1-y,1-z     |
| C8-H8B...l1  | 0.99 | 3.03  | 3.847(2) | 140.7 | 1+x,1.5-y,1/2+z |
| <b>9</b>     |      |       |          |       |                 |
| C15-H15...l1 | 0.95 | 3.164 | 3.837    | 129.2 | x,y,z           |
| C17-H17...l2 | 0.95 | 2.719 | 3.470(8) | 136.5 | x,y,z           |
| C5-H5...l1   | 0.95 | 3.014 | 3.938    | 164.1 | y,1-x,1-z       |
| C9-H9...l2   | 0.95 | 3.162 | 3.751(8) | 121.8 | 1-y,x,2-z       |
| C20-H20...l2 | 0.95 | 2.846 | 3.495(7) | 126.3 | 1.5-x,y,1.75-z  |
| C21-H21...l2 | 0.95 | 3.175 | 4.012(9) | 148.1 | 1/2+y,x,-1/4+z  |
